# Supplementary material
Source: Elsevier journal article supplement (https://www.sciencedirect.com/science/article/pii/S1576988721000777)
Supplement: mmc3 [file S1576988721000777:mmc3.docx]

**Supplementary Table 1:-** Detail of SARS-CoV-2 sequences from Indiasince March 2020 to 30th April 2021 with mutated NSP5 protein.

| **Serial No.** | **Accession** | **Release Date** | **Pango** | **Geolocation** | **Collection Date** |
| --- | --- | --- | --- | --- | --- |
|  | QTH36355 | 2021-03-30T00:00:00Z | B.1.36.8 | India | 5/15/2020 |
|  | QTH36403 | 2021-03-30T00:00:00Z | A.7 | India | 5/9/2020 |
|  | QTH36415 | 2021-03-30T00:00:00Z | A | India | 5/5/2020 |
|  | QTH36451 | 2021-03-30T00:00:00Z | A.7 | India | 5/14/2020 |
|  | QTG68689 | 2021-03-28T00:00:00Z | B.1 | India | 5/20/2020 |
|  | QTG68602 | 2021-03-27T00:00:00Z | B.1.36.8 | India | 5/18/2020 |
|  | QTG68615 | 2021-03-27T00:00:00Z | B.1.36.8 | India | 5/14/2020 |
|  | QRQ69279 | 2021-02-16T00:00:00Z | B.1.36.8 | India: Ahmedabad | 12/30/2020 |
|  | QNN26478 | 2020-09-02T00:00:00Z | B.1 | India: Ahmedabad | 6/18/2020 |
|  | QNL35816 | 2020-08-29T00:00:00Z | B.1.36.8 | India: Ahmedabad | 6/18/2020 |
|  | QNL35828 | 2020-08-29T00:00:00Z | B.1.36.8 | India: Ahmedabad | 6/18/2020 |
|  | QNL35972 | 2020-08-29T00:00:00Z | B.1.36.8 | India: Mehsana | 7/6/2020 |
|  | QNL36560 | 2020-08-29T00:00:00Z | B.1.1 | India: Ahmedabad | 6/25/2020 |
|  | QLQ87550 | 2020-07-27T00:00:00Z | B.1.36.10 | India: Surat | 6/17/2020 |
|  | QLQ87574 | 2020-07-27T00:00:00Z | B.1 | India: Surat | 6/17/2020 |
|  | QLQ87598 | 2020-07-27T00:00:00Z | B.1 | India: Vadodara | 6/15/2020 |
|  | QLI49695 | 2020-07-17T00:00:00Z | B.1.36.8 | India: Himatnagar | 6/14/2020 |
|  | QLI49731 | 2020-07-17T00:00:00Z | B.1 | India: Surat | 6/13/2020 |
|  | QLI49815 | 2020-07-17T00:00:00Z | B.1 | India: Surat | 6/13/2020 |
|  | QLF97949 | 2020-07-10T00:00:00Z | B.1.143 | India: Vadodara | 6/8/2020 |
|  | QLA10186 | 2020-06-29T00:00:00Z | B.1 | India: Bardoli | 6/12/2020 |
|  | QKV25955 | 2020-06-18T00:00:00Z | B.1.210 | India: Gujarat, Vadodara | 6/5/2020 |
|  | QKG91164 | 2020-06-04T00:00:00Z | B.1.36.8 | India: Ahmedabad | 5/24/2020 |
|  | QJY40383 | 2020-05-23T00:00:00Z | B.1 | India: Kodinar | 5/10/2020 |
|  | QJW00457 | 2020-05-20T00:00:00Z | B.1 | India: Modasa | 5/5/2020 |
|  | QJX44416 | 2020-05-20T00:00:00Z | B.1 | India: Ahmedabad | 4/29/2020 |
|  | QJW39854 | 2020-05-19T00:00:00Z | B.1 | India: Modasa | 5/5/2020 |
|  | QJW39902 | 2020-05-19T00:00:00Z | B.1 | India: Modasa | 5/5/2020 |
|  | QJW69137 | 2020-05-19T00:00:00Z | B.1 | India: Modasa | 5/5/2020 |
|  | QJT43414 | 2020-05-14T00:00:00Z | B.1 | India: Ahmedabad | 4/26/2020 |
|  | QJT43438 | 2020-05-14T00:00:00Z | B.1 | India: Ahmedabad | 4/26/2020 |
|  | QJR84475 | 2020-05-11T00:00:00Z | B.1 | India: Ahmedabad | 4/26/2020 |
