# Supplementary material
Source: Elsevier journal article supplement (https://www.sciencedirect.com/science/article/pii/S1576988721000777)
Supplement: mmc4 [file S1576988721000777:mmc4.docx]

Table 1: Mutational location after MSA of SARS-CoV-2 nsp5 protein sequence with position, wild type and mutated sequence.

| **Serial No.** | **Accession** | **Point of mutation** |
| --- | --- | --- |
|  | QTH36355 | A7V |
|  | QTH36403 | C22N |
|  | QTH36415 | K90R |
|  | QTH36451 | C22N |
|  | QTG68689 | H246Y |
|  | QTG68602 | A7V |
|  | QTG68615 | A7V |
|  | QRQ69279 | L89F |
|  | QNN26478 | K90R |
|  | QNL35816 | K90R |
|  | QNL35828 | P132L |
|  | QNL35972 | T196M |
|  | QNL36560 | I43V |
|  | QLQ87550 | K236R |
|  | QLQ87574 | K236R |
|  | QLQ87598 | P184S |
|  | QLI49695 | V212F |
|  | QLI49731 | K236R |
|  | QLI49815 | K236R |
|  | QLF97949 | K90R |
|  | QLA10186 | K236R |
|  | QKV25955 | V114G |
|  | QKG91164 | L75F |
|  | QJY40383 | P132S |
|  | QJW00457 | N142L |
|  | QJX44416 | N142L |
|  | QJW39854 | N142L |
|  | QJW39902 | N142L |
|  | QJW69137 | Q127R |
|  | QJW69137 | T190A |
|  | QJT43414 | L75F |
|  | QJT43438 | L75F |
|  | QJR84475 | N142L |
