# Supplementary material
Source: Elsevier journal article supplement (https://www.sciencedirect.com/science/article/pii/S1576988721000777)
Supplement: mmc5 [file S1576988721000777:mmc5.docx]

| Variant | PROVEAN score | Prediction (cutoff= -2.5) |
| --- | --- | --- |
| K236R | -0.451 | Neutral |
| N142L | -4.300 | Deleterious |
| K90R | -1.989 | Neutral |
| A7V | -2.352 | Neutral |
| L75F | -3.785 | Deleterious |
| C22N | -2.622 | Deleterious |
| H246Y | -0.645 | Neutral |
| I43V | -0.826 | Neutral |

Table 2 List of 8 nonsynonymous amino acid substitutions in nsp5 protein (cutoff= -2.5)
